# Supplementary material
Source: PubMed Central journal article supplement (PMC2409154)

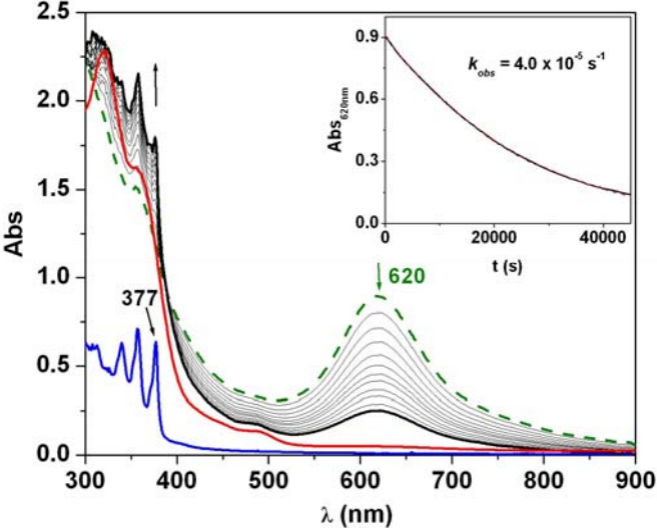

Supplement: pnas_0708516105_3.pdf [file pnas_0708516105_3.pdf]

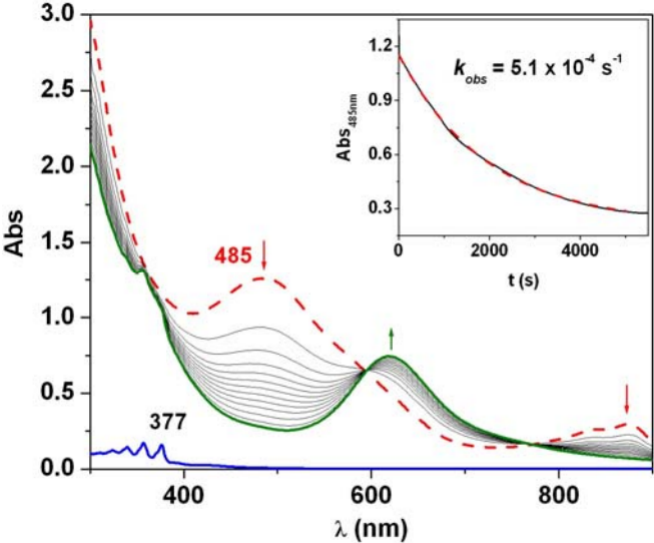

Supplement: pnas_0708516105_4.pdf [file pnas_0708516105_4.pdf]
